# Supplementary material for: Manganese-based nanozyme enabled efficient mitigation of Huanglongbing-induced oxidative damage in Citrus
Source: Royal Society of Chemistry journal article supplement (doi:10.1039/d4en00519h), 2024-09-30
Supplement: d4en00519h1.pdf [file d4en00519h1.pdf]

## Supplementary Information

### **Manganese-based nanozyme enables efficient mitigation of Huanglongbing-induced oxidative damage in *Citrus***

*Shuojun Li<sup>ac†</sup>, Yuying Long<sup>b†</sup>, Guiyun Deng<sup>a</sup>, Yinghui Men<sup>d</sup>, Feifan Lu<sup>b</sup>, Zihan Wang<sup>c</sup>, Jiaying Li<sup>a</sup>, and Heyou Han<sup>ab\*</sup>*

<sup>a</sup>National Key Laboratory of Agricultural Microbiology, College of Life Science and Technology, Huazhong Agricultural University, Wuhan, 430070, China.

<sup>b</sup>National Key Laboratory of Agricultural Microbiology, College of Chemistry, Huazhong Agricultural University, Wuhan, 430070, China.

<sup>c</sup>National Key Laboratory of Molecular Biology, CAS Center for Excellence in Molecular Cell Science, Shanghai Institute of Biochemistry and Cell Biology, 200031, China.

<sup>d</sup>Med-X Research Institute and School of Biomedical Engineering, Shanghai JiaoTong University, Shanghai, 200030, China.

*Correspondence: Heyou Han ([hyhan@mail.hzau.edu.cn](mailto:hyhan@mail.hzau.edu.cn))*

**Table S1.** Primers used in this study.

| <b>Name</b>  | <b>Sequence</b>          |
|--------------|--------------------------|
| Cs6226SOD-F  | GCTATAGGCTTGGGTAAATC     |
| Cs6226SOD-R  | CCGCCTTGTTGTAGTTAGTA     |
| Cs6642SOD-F  | GGCTCACGTTCTCCTCGTAG     |
| Cs6642SOD-R  | ATTTGAGGGAGACGCCGTG      |
| Cs2588SOD-F  | CAGTTTGGATATGTGGGAGC     |
| Cs2588SOD-R  | GGTTTCGCCTAAATTCACGA     |
| Cs6866CAT-F  | AATCCCTGACATGGTCCAT      |
| Cs6866CAT-R  | AACACCAGATCCTTCCATGT     |
| Cs5999CAT-F  | ACAGCCACGCTACTCAGGAT     |
| Cs5999CAT-R  | TGTTCAAGACCAAGCGTCCA     |
| Cs0069RBOH-F | AGCAACTCGTTGGTTCAGAA     |
| Cs0069RBOH-R | GTAATATGCCGTGGACGATG     |
| Actin-F      | TCCAAGCAGCATGAAGATCAA    |
| Actin-R      | CAGACTCATCATACTCGCCCT    |
| HLB-F        | ACCAGTTCTTATTCCATTCGCCC  |
| HLB-R        | TCACAATCATGTTTTTCAAGCCAA |

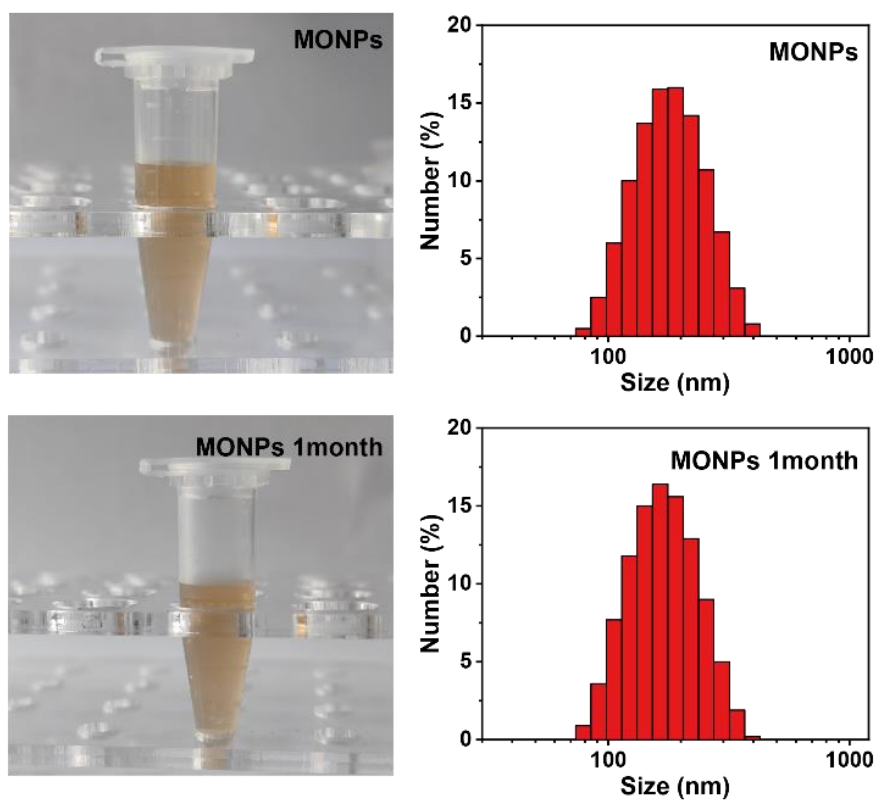

**Figure S1.** The stability of MONPs for long-term storage. The MONPs supernatant and DLS did not change after 1 month storage.

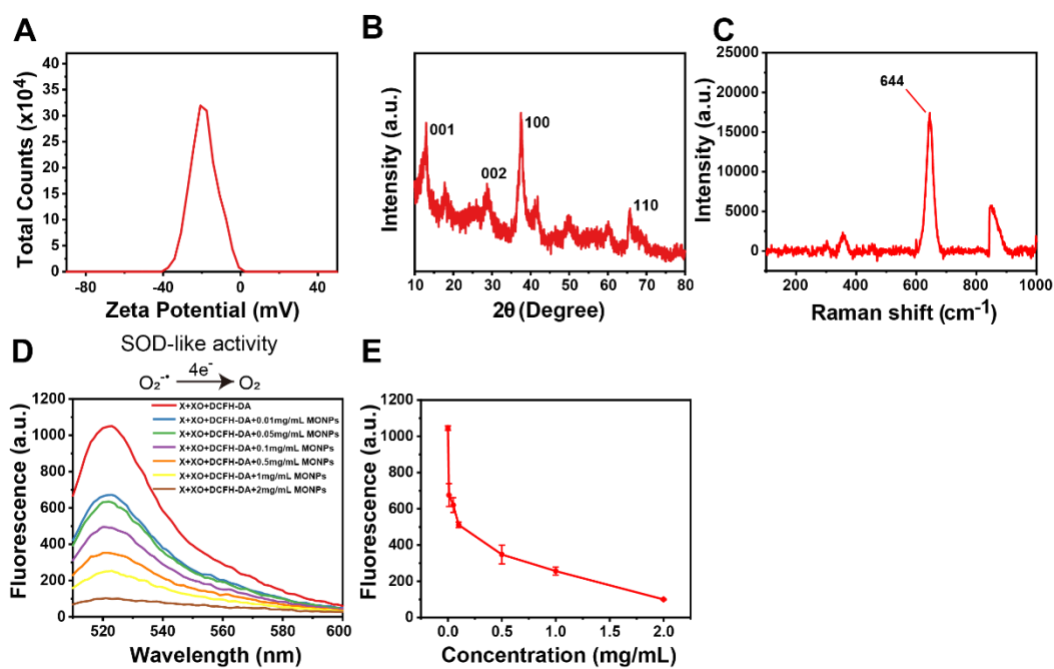

**Figure S2.** Characterization of the MONPs nano-enzyme. **(A)** Zeta potential analysis of the MONPs. **(B)** XRD (X-ray Powder diffractometer) pattern of the MONPs. **(C)** Raman pattern of the MONPs. **(D&E)** The fluorescence intensity of DCFH-DA after the reaction with X and XO in the absence and presence of the MONPs. X for xanthine and XO for xanthine oxidase, respectively. (Data are means, the statistic of peak points  $\pm$  SD,  $n=3$ ).

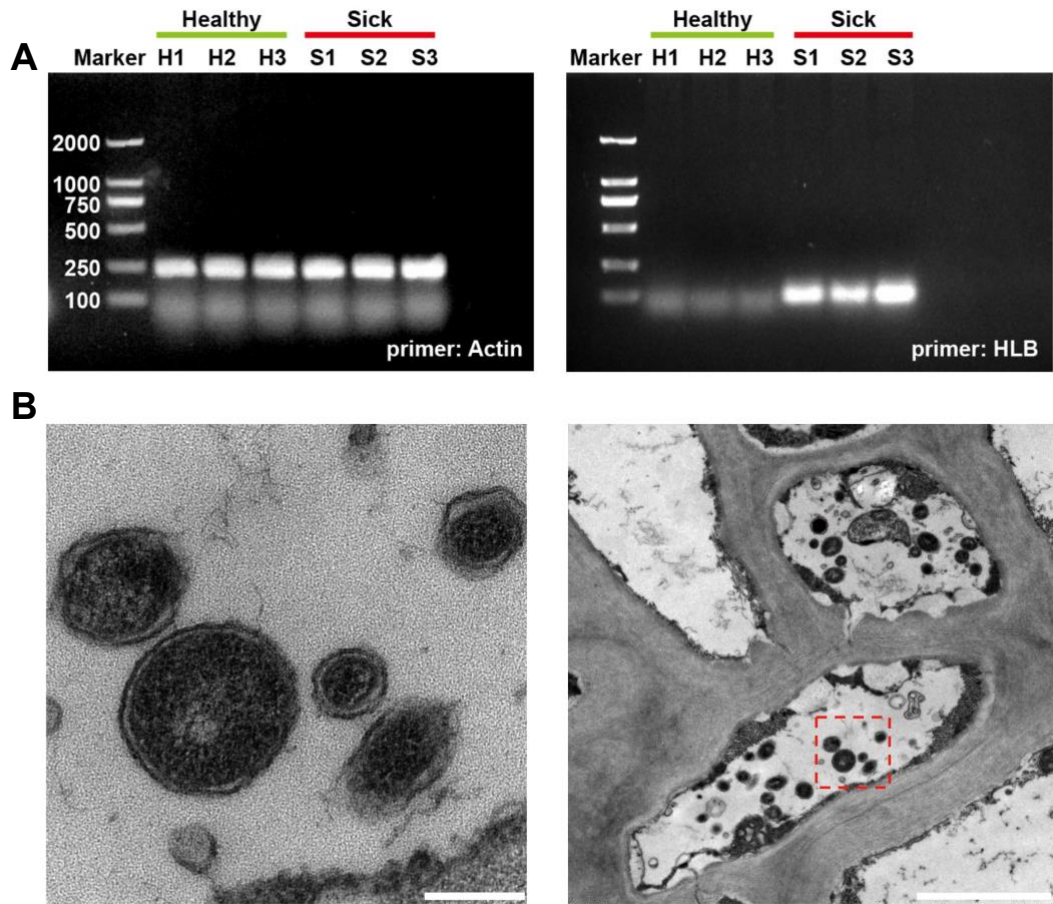

**Figure S3.** Confirm of the Clas-positive infection in HLB-*Citrus*. **(A)** PCR analysis of the genomic DNA of Clas in *Citrus* tissues. H1, H2, H3 means the healthy *Citrus*; S1, S2, S3 means the HLB-*Citrus*. **(B)** Representative TEM images of the Clas colonization in HLB-*Citrus*. Scale bar: 500 nm (right) and full size of 5  $\mu$ m (left).

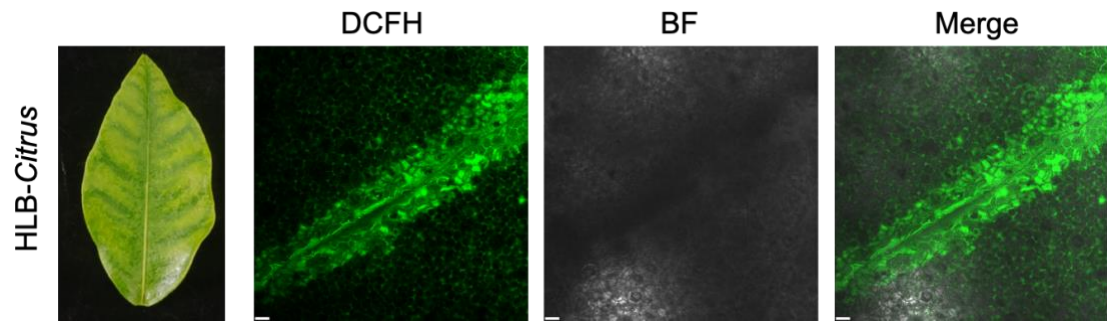

**Figure S4.** Screen reactive oxygen species fluorescence probe for trace ROS localization in HLB-Citrus leaf. Scale bar: 20  $\mu\text{m}$ .

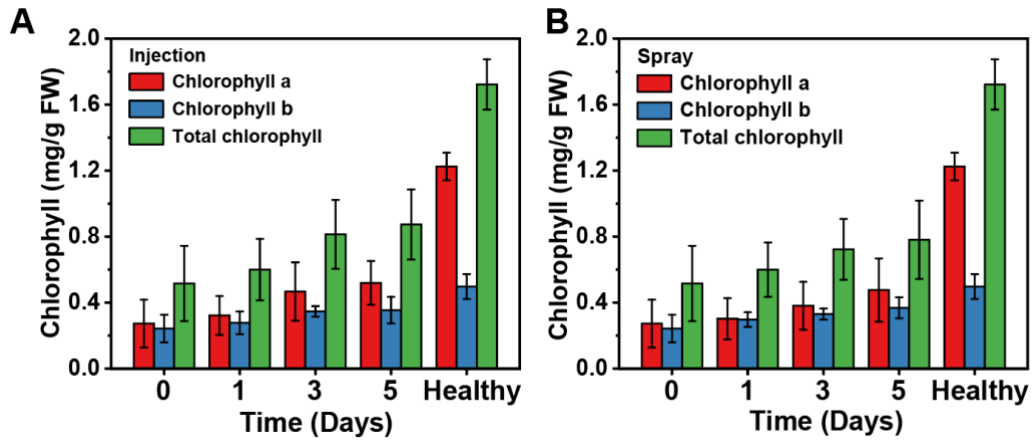

**Figure S5.** Effects of MONPs on the Chlorophyll content of HLB-Citrus (Data are means  $\pm$  SD, n=3).

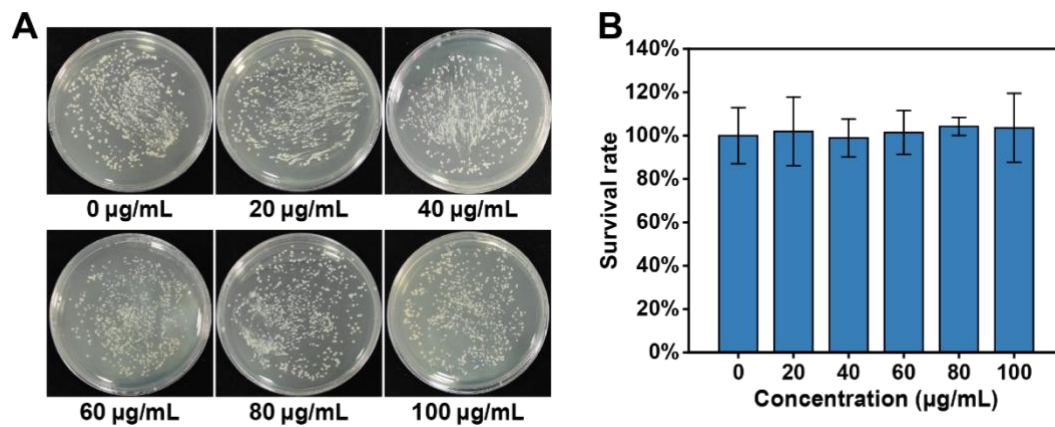

**Figure S6.** Assay of the *in vitro* antibacterial activity of MONPs. *Sinorhizobium meliloti Rm1021* (*S. meliloti Rm1021*) was co-incubated with MONPs at different concentrations (0, 20, 40, 60, 80, 100 µg/mL). **(A)** Representative images of the diluted coating plate; **(B)** Quantitative analysis of antibacterial activity of the MONPs against *S. meliloti Rm1021* (Data are means  $\pm$  SD, n=3).



Healthy *Citrus*

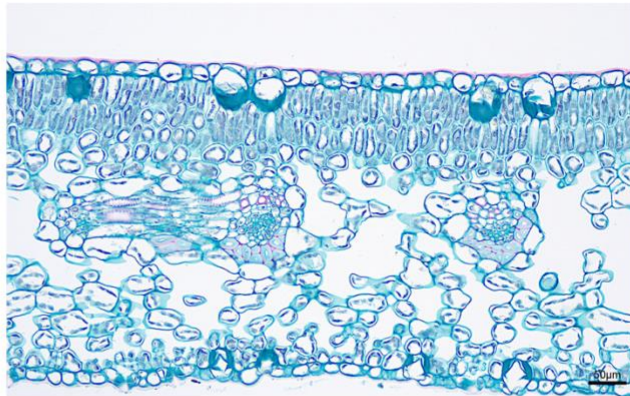

HLB-*Citrus*

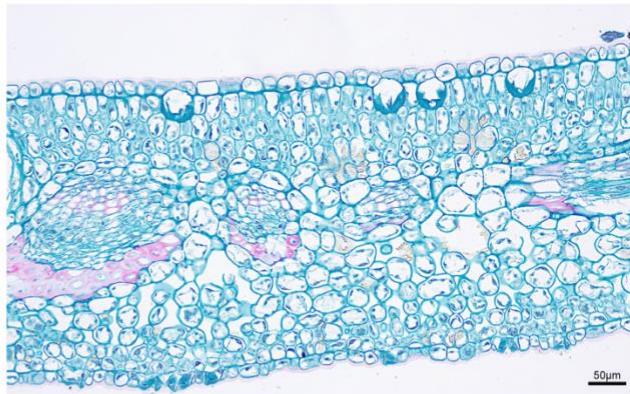

MONPs sprayed  
HLB-*Citrus*

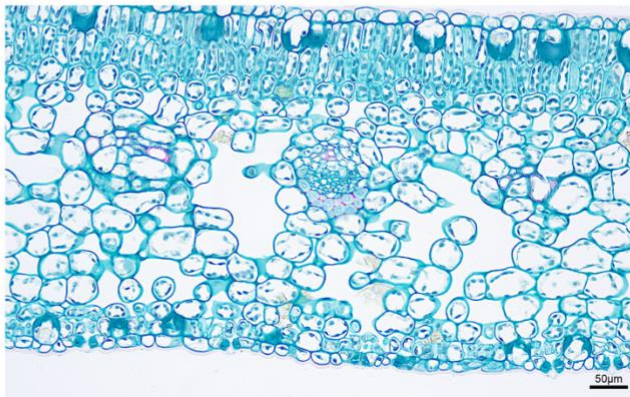

**Figure S7.** Representative images of the *Citrus* leaf tissues staining with histochemical safranin O-fast green solution to observe the morphology.

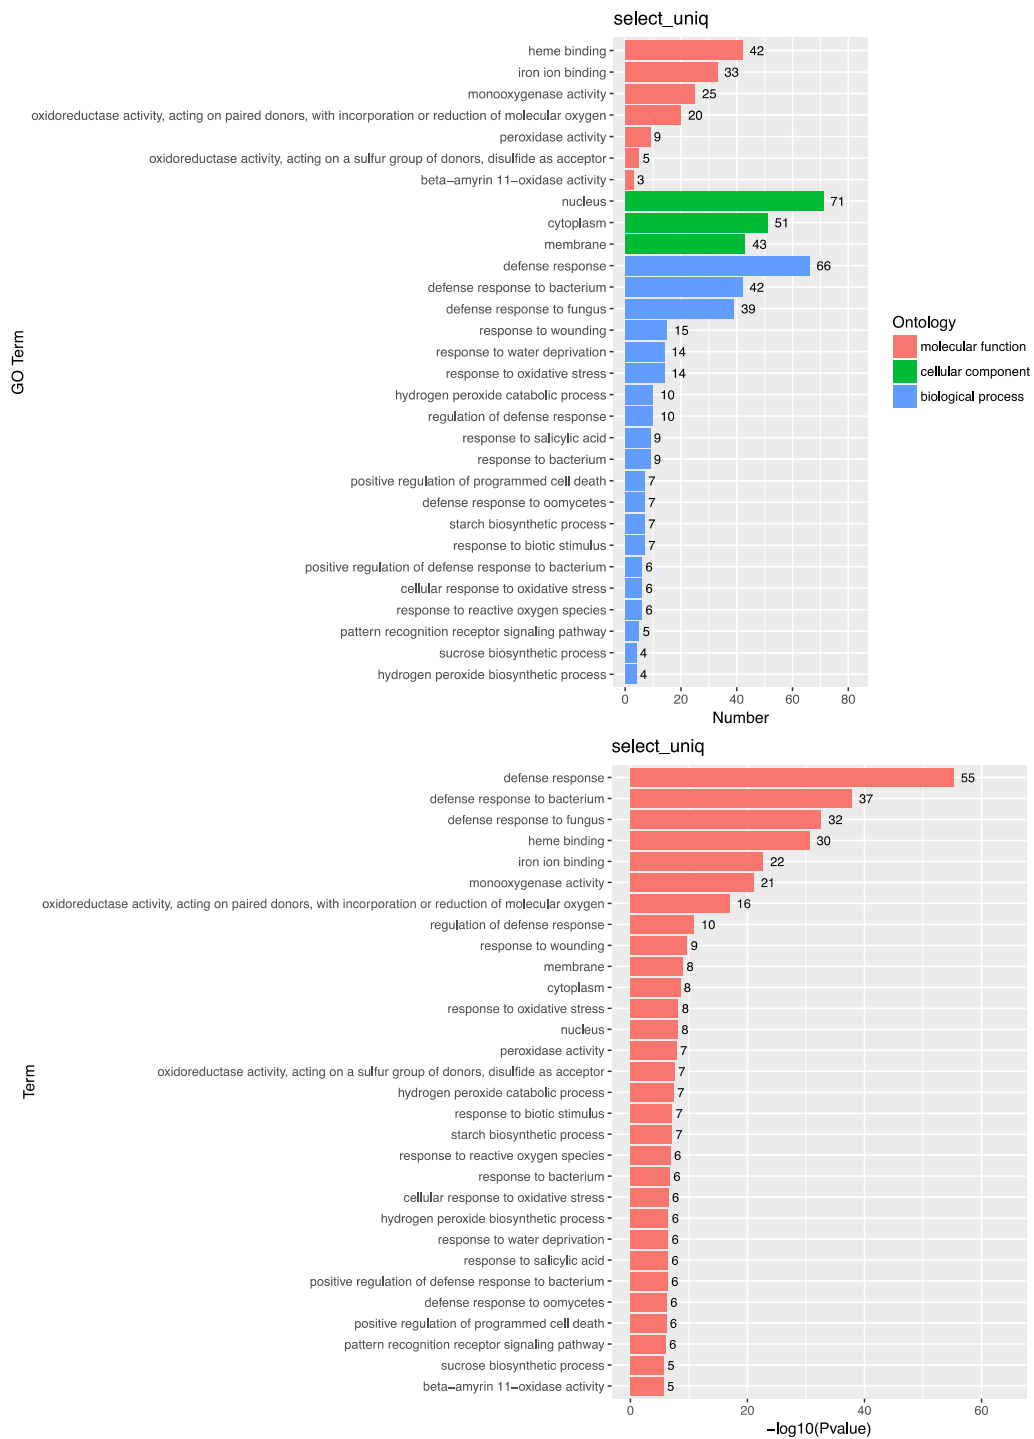

**Figure S8.** GO enrichment histogram of top 30 GO function terms of HLB symptom related differentially expressed genes (DEGs).
